# Supplementary material for: Effects of flux treatment on morphology of single-crystalline BaNbO2N particles
Source: Royal Society of Chemistry journal article supplement (doi:10.1039/c5ce02335a), 2016-01-01
Supplement: c5ce02335a1.pdf [file c5ce02335a1.pdf]

# Effects of flux treatment on morphology of single-crystalline BaNbO<sub>2</sub>N particles

*Masanori Kodera, Masao Katayama, Takashi Hisatomi, Tsutomu Minegishi, and*

*Kazunari Domen\**

Department of Chemical System Engineering, School of Engineering, The University of

Tokyo, 7-3-1 Hongo, Bunkyo-ku, Tokyo 113-8656, Japan

## Electronic Supplementary information

### Contents

#### Figure S1

Powder XRD patterns in the  $2\theta$  range of 30–60° for BaNbO<sub>2</sub>N treated using three different kinds of flux.

#### Figure S2

Powder XRD patterns for BaNbO<sub>2</sub>N treated using three different kinds of flux.

#### Figure S3

Schematic illustration of two-boat flux treatment setup.

#### Table S1

Elemental analysis (atomic ratio) results before and after flux treatment using alkali chlorides.

(1) XRD patterns for BaNbO<sub>2</sub>N treated using different alkali chloride fluxes

Figure S1 shows magnified regions of the XRD patterns in Figure 1 in the  $2\theta$  range of 30–60°. For BaNbO<sub>2</sub>N(NaCl), BaNbO<sub>2</sub>N(KCl) and BaNbO<sub>2</sub>N(RbCl), diffraction peaks associated with NbO<sub>x</sub>N<sub>y</sub> phases were also observed, indicating the chemical reduction of Nb species during the flux treatment. Figure S2 shows the  $2\theta$  range of 63–64.4°. Splitting of the (220) peak can be observed, corresponding to  $K_{\alpha 1}$  and  $K_{\alpha 2}$ . After the flux treatment, the splitting became more pronounced, indicating an improvement in crystallinity. The dashed line indicates the (220) peak position for BaNbO<sub>2</sub>N before treatment. For BaNbO<sub>2</sub>N(NaCl) and BaNbO<sub>2</sub>N(CsCl), the split peak shifted to higher and lower angles, respectively.

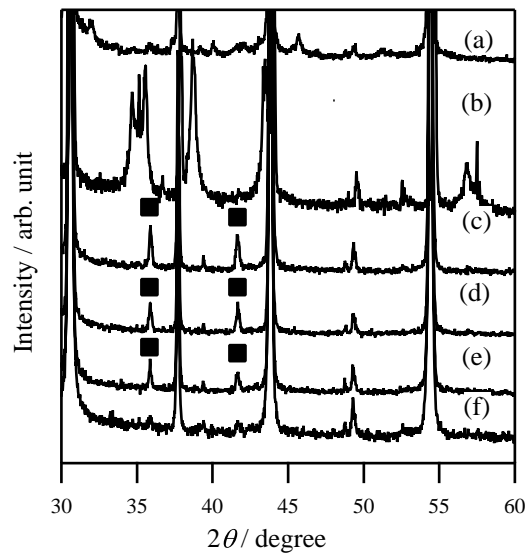

**Figure S1.** XRD patterns for BaNbO<sub>2</sub>N particles (a) before and after flux treatment with (b) LiCl, (c) NaCl, (d) KCl, (e) RbCl, and (f) CsCl. Square symbols (■) indicate NbO<sub>x</sub>N<sub>y</sub>.

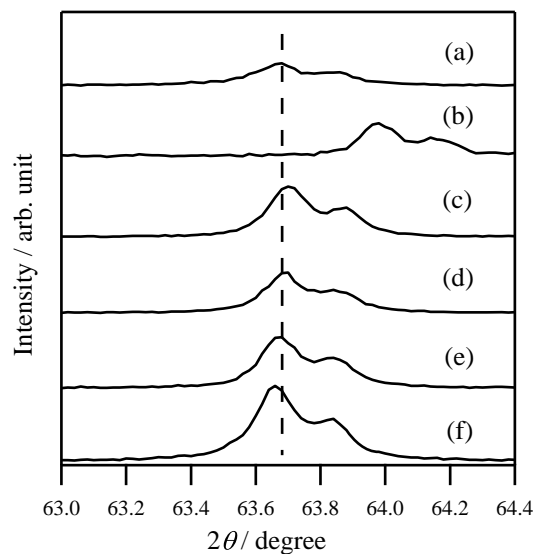

**Figure S2.** XRD patterns for  $\text{BaNbO}_2\text{N}$  particles (a) before and after flux treatment with (b)  $\text{LiCl}$ , (c)  $\text{NaCl}$ , (d)  $\text{KCl}$ , (e)  $\text{RbCl}$ , and (f)  $\text{CsCl}$ .

## (2) Schematic illustration of two-boat flux treatment setup

Figure S3 shows a schematic illustration of the two-boat flux treatment setup. Two alumina boats were inserted inside an alumina tube and were heated under an  $\text{NH}_3$  flow. An  $\text{NaCl}$  flux and  $\text{BaNbO}_2\text{N}$  particles was placed in the upstream and downstream boats, respectively. During the flux treatment, both boats were heated to the same temperature.

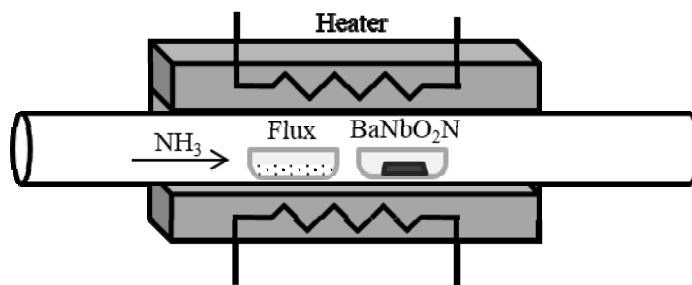

**Figure S3.** Schematic illustration of two-boat flux treatment setup.

### (3) Elemental analysis

Elemental analysis results for BaNbO<sub>2</sub>N before and after flux treatment with NaCl, KCl, RbCl, and CsCl are shown in Table S1. The amount of Ba, Nb, and alkali metal (except Cs) was determined by ICP-AES. The amount of Cs was determined by XRF. The amount of O and N was determined by combustion analysis.

**Table S1.** Elemental analysis results (atomic ratio) before and after flux treatment using alkali chlorides.

| Flux | Cation of flux     | Ba <sup>a</sup> | Nb <sup>a</sup> | O <sup>b</sup> | N <sup>b</sup> |
|------|--------------------|-----------------|-----------------|----------------|----------------|
| –    | –                  | 1.00            | 0.91            | 2.66           | 0.80           |
| NaCl | 0.05 <sup>a</sup>  | 1.00            | 1.11            | 2.24           | 1.11           |
| KCl  | 0.02 <sup>a</sup>  | 1.00            | 1.04            | 2.03           | 1.03           |
| RbCl | 0.005 <sup>a</sup> | 1.00            | 1.04            | 2.02           | 1.05           |
| CsCl | 0.03 <sup>c</sup>  | 1.00            | 1.02            | 2.07           | 1.00           |

<sup>a</sup> Determined by ICP analysis

<sup>b</sup> Determined by combustion analysis

<sup>c</sup> Determined by XRF analysis
